# Supplementary material for: Illumina-based RiboMethSeq approach for mapping of 2′-O-Me residues in RNA
Source: PubMed Central journal article supplement — Nucleic Acids Res. 2016 Jun 14;44(16):e135. doi: 10.1093/nar/gkw547 (PMC5027498; doi:10.1093/nar/gkw547), 2016-06-14
Supplement: supp_gkw547_nar-00545-met-k-2016-File009.pdf [file supp_gkw547_nar-00545-met-k-2016-File009.pdf]

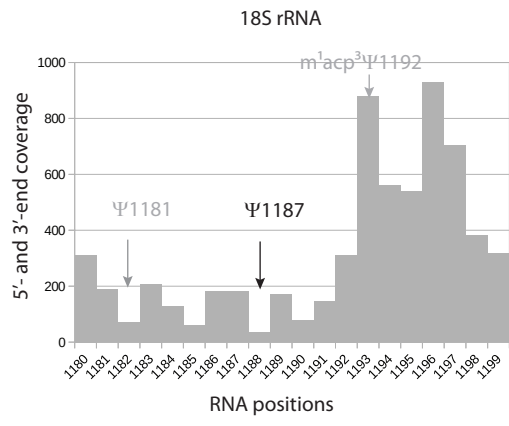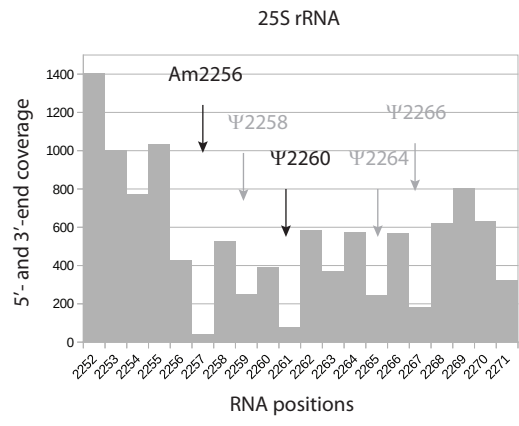

Marchand et al Figure S1

Score MAX 25S rRNA

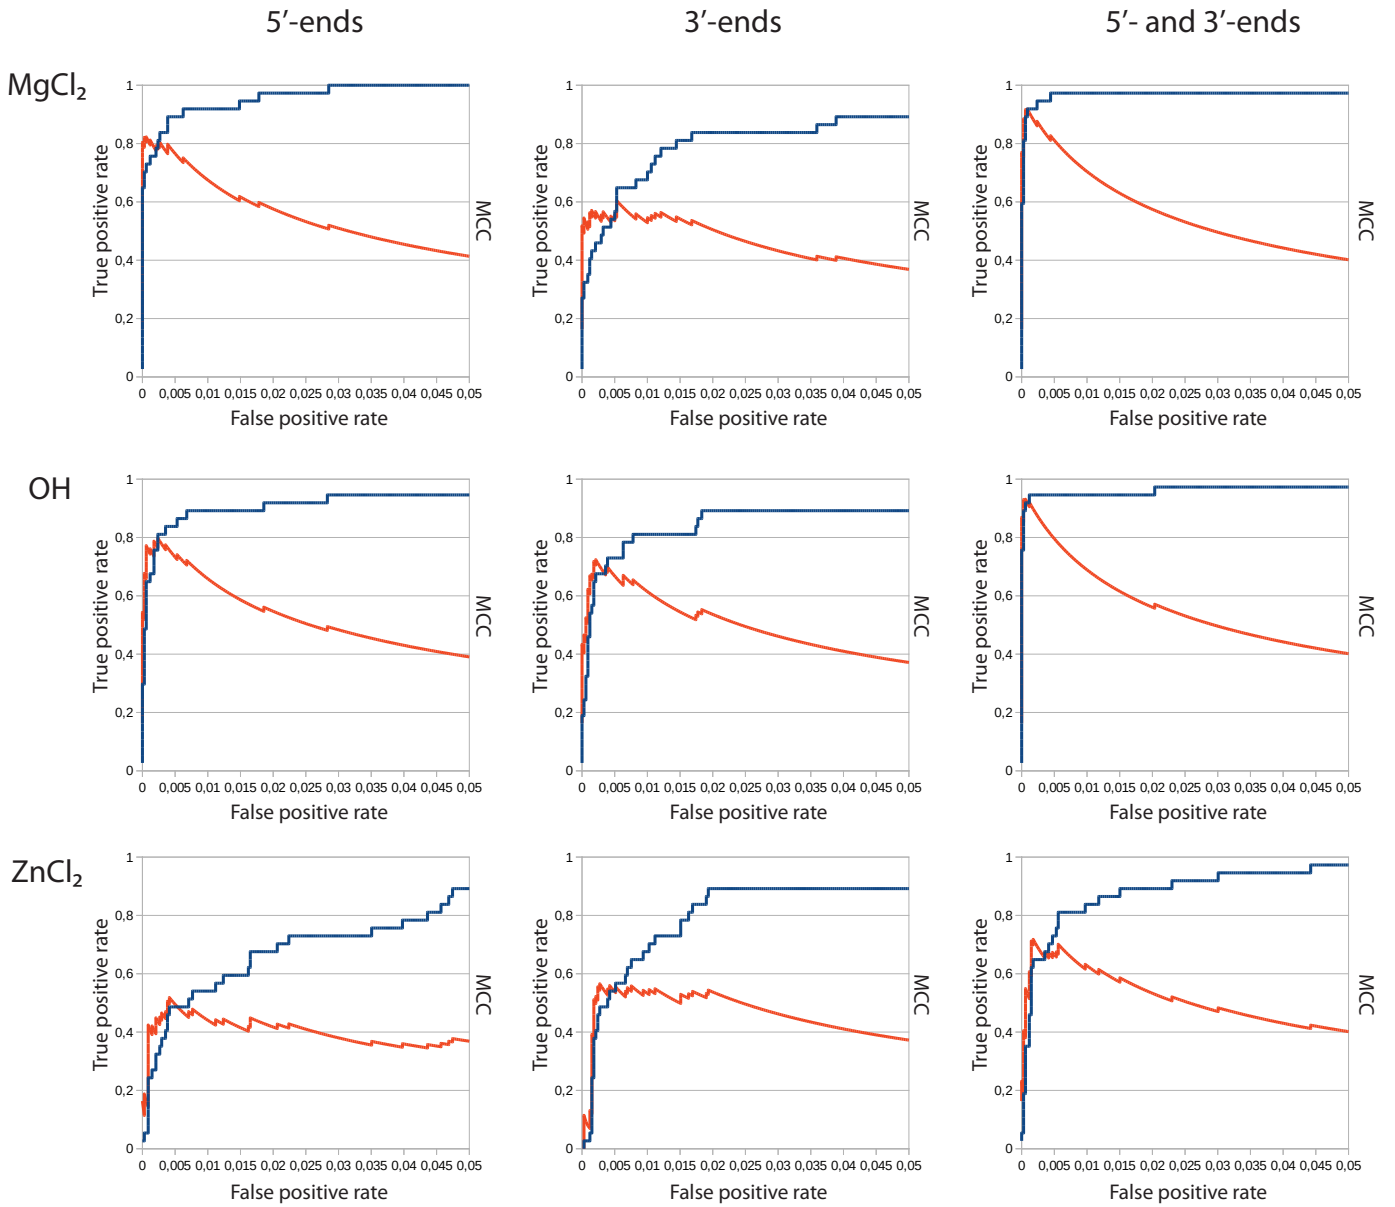

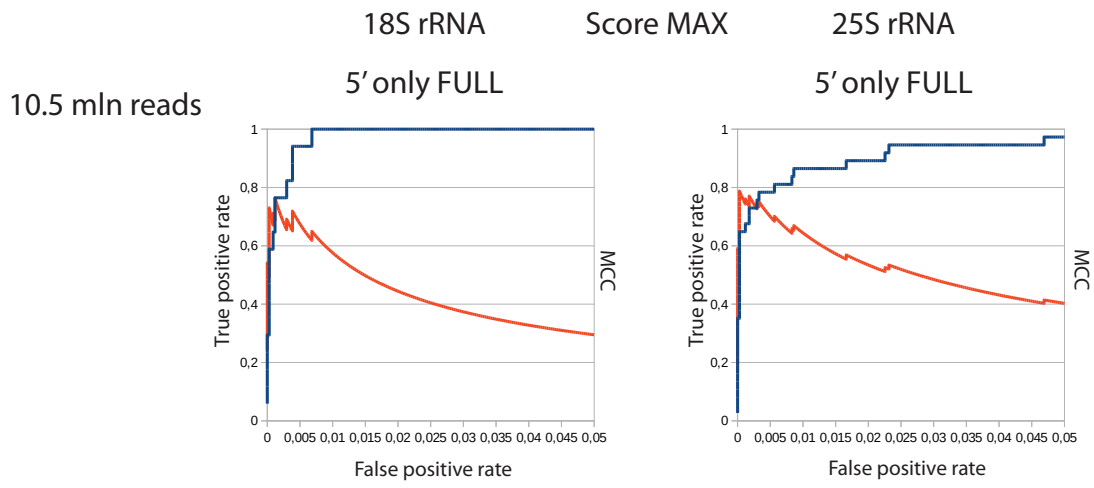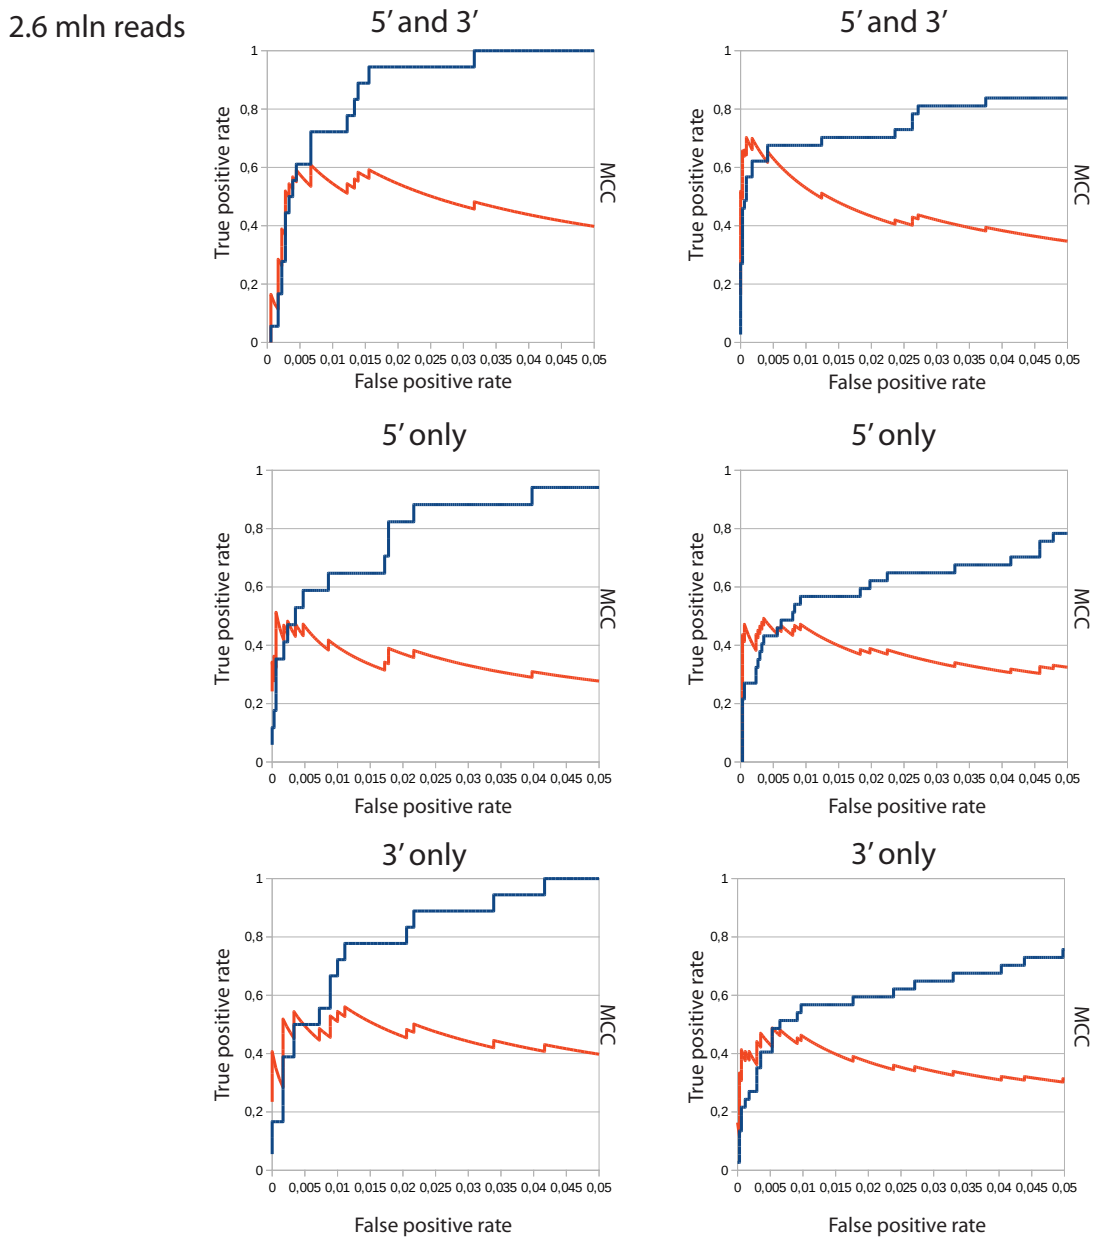

HiSeq Data WT technical replicate Stat1

Score MAX, 25S rRNA (5'-ends)

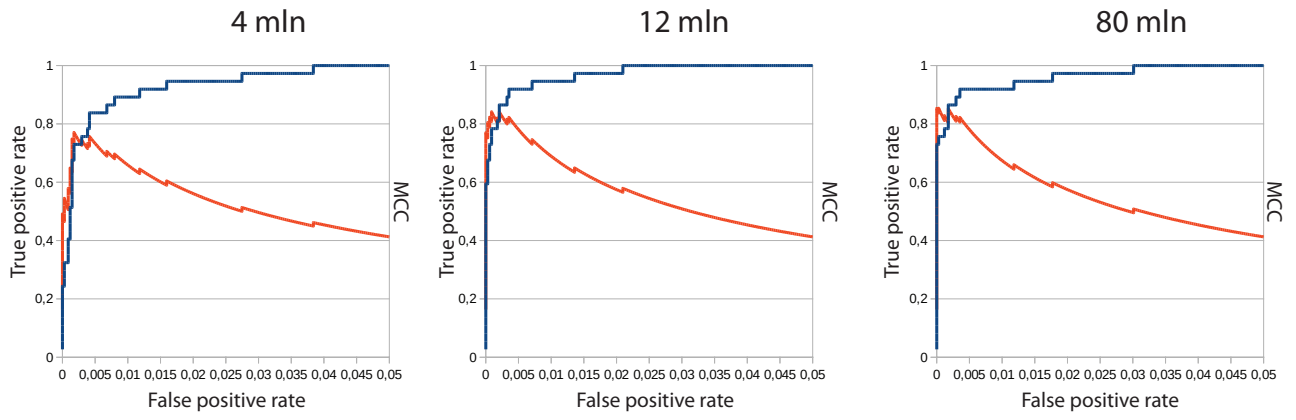

Marchand et al Figure S4

### 18S rRNA

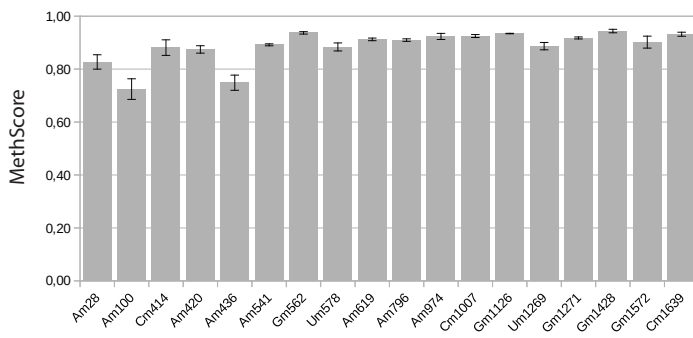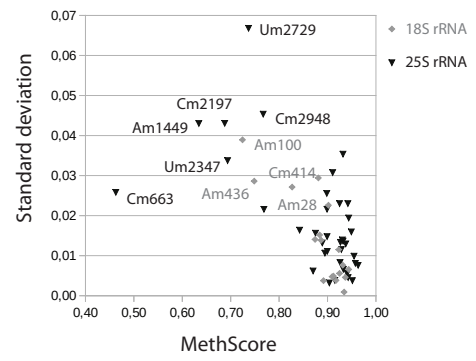

### 25S rRNA

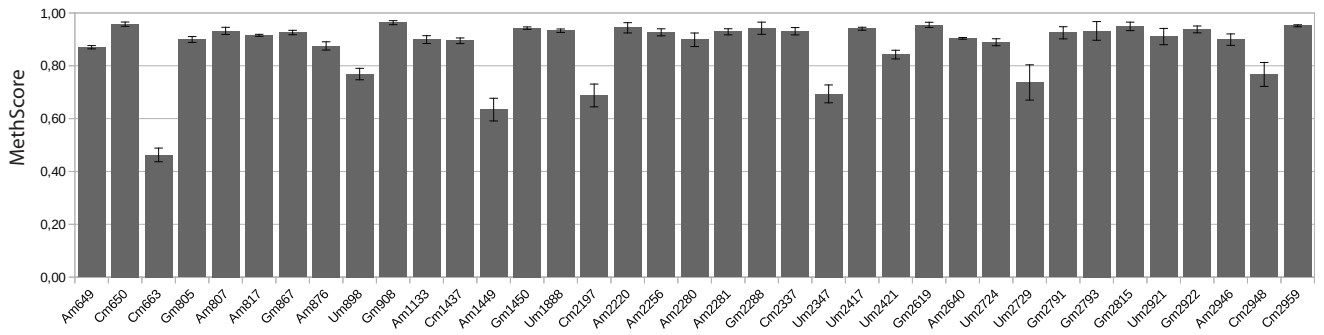

A

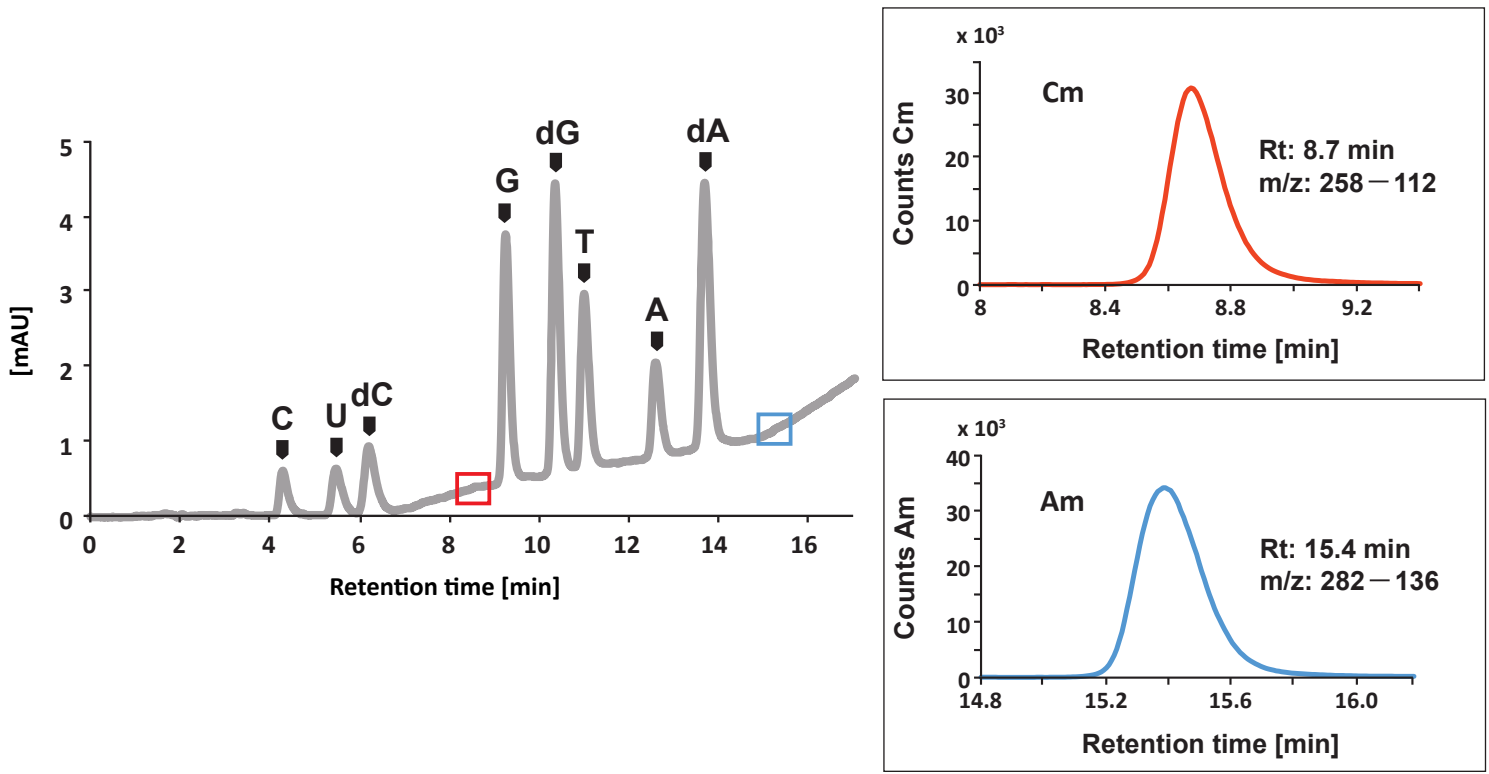

B

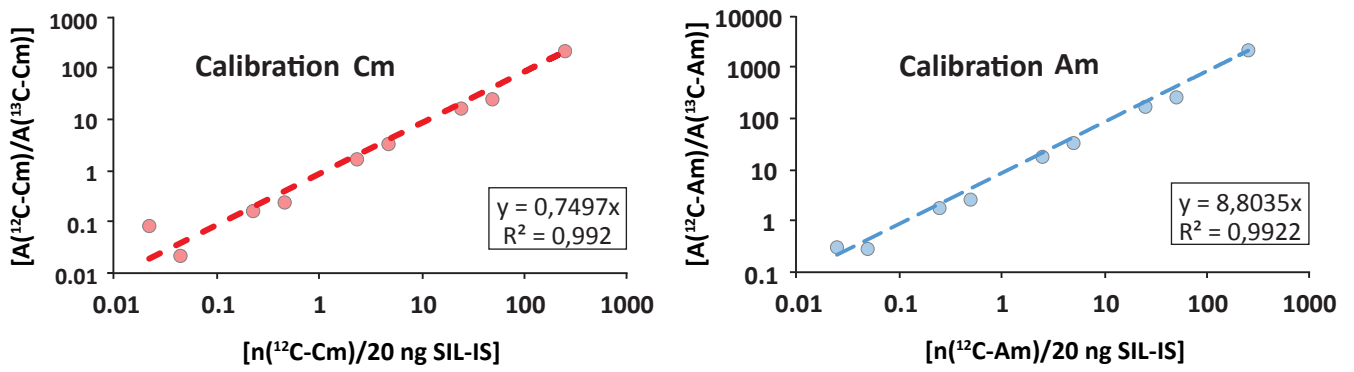

Marchand et al Figure S6

### 18S rRNA

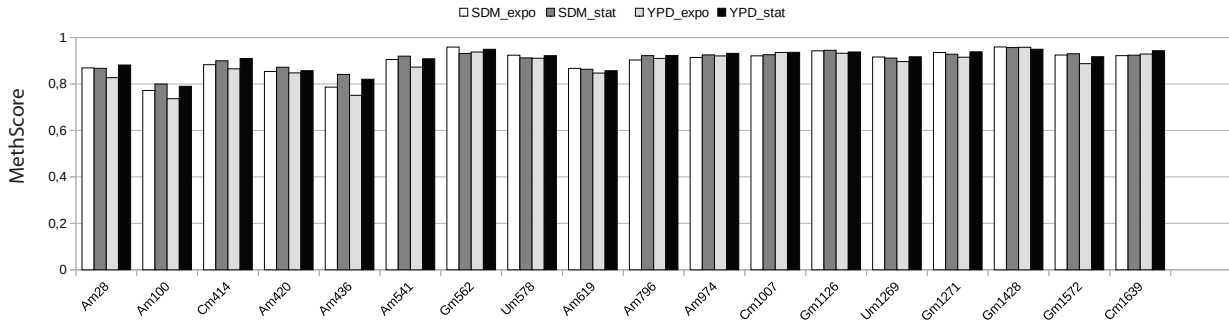

### 25S rRNA

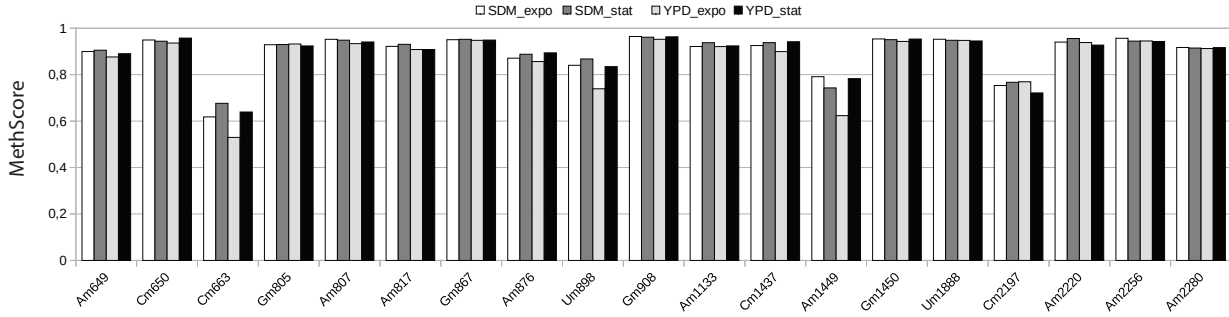

### 25S rRNA

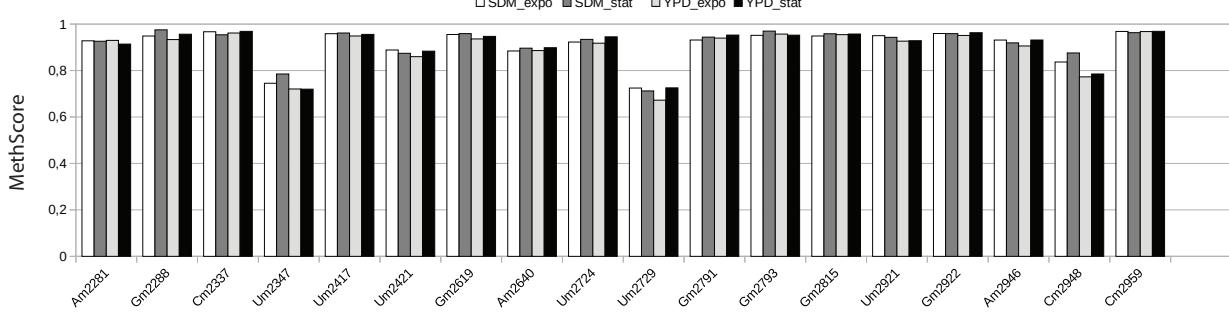

Total reads: 18552976  
tRNAreads: 559113  
tRNAHis reads: 19687

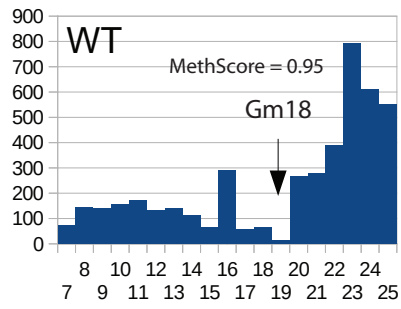

tRNAHis reads: 18442

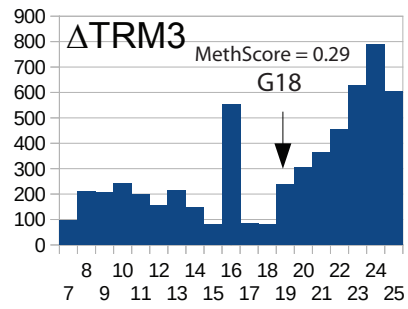

Marchand et al Figure S8
